# Supplementary material for: Timing of device reimplantation and reinfection rates following cardiac implantable electronic device infection: a systematic review and meta-analysis
Source: PubMed Central journal article supplement — BMJ Open. 2019 Sep 3;9(9):e029537. doi: 10.1136/bmjopen-2019-029537 (PMC6731831; doi:10.1136/bmjopen-2019-029537), 2019-09-03
Supplement: bmjopen-2019-029537supp001.pdf [file bmjopen-2019-029537supp001.pdf]

**APPENDIX A. MOOSE Checklist for Reporting of Meta-analyses of Observation Studies**

| Item No                                     | Recommendation                                                                                                                                                                                                                                                               | Reported on Page No  |
|---------------------------------------------|------------------------------------------------------------------------------------------------------------------------------------------------------------------------------------------------------------------------------------------------------------------------------|----------------------|
| Reporting of background should include      |                                                                                                                                                                                                                                                                              |                      |
| 1                                           | Problem definition                                                                                                                                                                                                                                                           | 4                    |
| 2                                           | Hypothesis statement                                                                                                                                                                                                                                                         | 4                    |
| 3                                           | Description of study outcome(s)                                                                                                                                                                                                                                              | 6                    |
| 4                                           | Type of exposure or intervention used                                                                                                                                                                                                                                        | 6                    |
| 5                                           | Type of study designs used                                                                                                                                                                                                                                                   | 6                    |
| 6                                           | Study population                                                                                                                                                                                                                                                             | 5                    |
| Reporting of search strategy should include |                                                                                                                                                                                                                                                                              |                      |
| 7                                           | Qualifications of searchers (eg, librarians and investigators)                                                                                                                                                                                                               | Title page           |
| 8                                           | Search strategy, including time period included in the synthesis and key words                                                                                                                                                                                               | 5, Figure 1          |
| 9                                           | Effort to include all available studies, including contact with authors                                                                                                                                                                                                      | 5                    |
| 10                                          | Databases and registries searched                                                                                                                                                                                                                                            | 5                    |
| 11                                          | Search software used, name and version, including special features used (eg, explosion)                                                                                                                                                                                      | 5                    |
| 12                                          | Use of hand searching (eg, reference lists of obtained articles)                                                                                                                                                                                                             | 5                    |
| 13                                          | List of citations located and those excluded, including justification                                                                                                                                                                                                        | 7                    |
| 14                                          | Method of addressing articles published in languages other than English                                                                                                                                                                                                      | -                    |
| 15                                          | Method of handling abstracts and unpublished studies                                                                                                                                                                                                                         | 5                    |
| 16                                          | Description of any contact with authors                                                                                                                                                                                                                                      | -                    |
| Reporting of methods should include         |                                                                                                                                                                                                                                                                              |                      |
| 17                                          | Description of relevance or appropriateness of studies assembled for assessing the hypothesis to be tested                                                                                                                                                                   | 5                    |
| 18                                          | Rationale for the selection and coding of data (eg, sound clinical principles or convenience)                                                                                                                                                                                | 5-6                  |
| 19                                          | Documentation of how data were classified and coded (eg, multiple raters, blinding and interrater reliability)                                                                                                                                                               | 5                    |
| 20                                          | Assessment of confounding (eg, comparability of cases and controls in studies where appropriate)                                                                                                                                                                             | 6                    |
| 21                                          | Assessment of study quality, including blinding of quality assessors, stratification or regression on possible predictors of study results                                                                                                                                   | 6                    |
| 22                                          | Assessment of heterogeneity                                                                                                                                                                                                                                                  | 6                    |
| 23                                          | Description of statistical methods (eg, complete description of fixed or random effects models, justification of whether the chosen models account for predictors of study results, dose-response models, or cumulative meta-analysis) in sufficient detail to be replicated | 6                    |
| 24                                          | Provision of appropriate tables and graphics                                                                                                                                                                                                                                 | Table 1, Figures 1-3 |

| Reporting of results should include     |                                                                                                                           |               |
|-----------------------------------------|---------------------------------------------------------------------------------------------------------------------------|---------------|
| 25                                      | Graphic summarizing individual study estimates and overall estimate                                                       | Figure 2,3    |
| 26                                      | Table giving descriptive information for each study included                                                              | Table 1       |
| 27                                      | Results of sensitivity testing (eg, subgroup analysis)                                                                    | 8, Figure 3   |
| 28                                      | Indication of statistical uncertainty of findings                                                                         | 8, Figure 2-3 |
| Reporting of discussion should include  |                                                                                                                           |               |
| 29                                      | Quantitative assessment of bias (eg, publication bias)                                                                    | 10            |
| 30                                      | Justification for exclusion (eg, exclusion of non-English language citations)                                             | -             |
| 31                                      | Assessment of quality of included studies                                                                                 | Appendix      |
| Reporting of conclusions should include |                                                                                                                           |               |
| 32                                      | Consideration of alternative explanations for observed results                                                            | 8-9           |
| 33                                      | Generalization of the conclusions (ie, appropriate for the data presented and within the domain of the literature review) | 10-11         |
| 34                                      | Guidelines for future research                                                                                            | 10-11         |
| 35                                      | Disclosure of funding source                                                                                              | 11            |

From: Stroup DF, Berlin JA, Morton SC, et al, for the Meta-analysis Of Observational Studies in Epidemiology (MOOSE) Group. Meta-analysis of Observational Studies in Epidemiology. A Proposal for Reporting. *JAMA*. 2000;283(15):2008-2012. doi: 10.1001/jama.283.15.2008.

## APPENDIX B. Detailed Search Strategy

### EMBASE Search Strategy

1. exp pacemaker/ or exp implantable cardioverter defibrillator/ or exp artificial heart  
pacemaker/ or exp defibrillator
2. cardiac implantable electronic device.mp.
3. cardiovascular implantable electronic device.mp.
4. pacemaker.mp. [mp=title, abstract, heading word, drug trade name, original title, device  
manufacturer, drug manufacturer, device trade name, keyword, floating subheading  
word]
5. defibrillator.mp. [mp=title, abstract, heading word, drug trade name, original title,  
device manufacturer, drug manufacturer, device trade name, keyword, floating  
subheading word]
6. cardiac resynchronization therapy.mp. or exp cardiac resynchronization therapy/
7. 1 or 2 or 3 or 4 or 5 or 6
8. device infection.mp. or exp infection/ or exp device infection/
9. infection.mp.
10. 8 or 9
11. reimplantation or exp Reimplantation/
12. 7 and 10 and 11

### MEDLINE Search Strategy

1. exp pacemaker/ or exp implantable cardioverter defibrillator/ or exp artificial heart  
pacemaker/ or exp defibrillator
2. cardiac implantable electronic device.mp.
3. cardiovascular implantable electronic device.mp.
4. pacemaker.mp. [mp=title, abstract, heading word, drug trade name, original title, device  
manufacturer, drug manufacturer, device trade name, keyword, floating subheading  
word]
5. defibrillator.mp. [mp=title, abstract, heading word, drug trade name, original title,  
device manufacturer, drug manufacturer, device trade name, keyword, floating  
subheading word]
6. cardiac resynchronization therapy.mp. or exp cardiac resynchronization therapy/
7. 1 or 2 or 3 or 4 or 5 or 6
8. device infection.mp. or exp infection/ or exp device infection/
9. infection.mp.
10. 8 or 9
11. reimplantation or exp Reimplantation/
12. 7 and 10 and 11

#### Cochrane Library Search Strategy

1. exp pacemaker/ or exp implantable cardioverter defibrillator/ or exp artificial heart  
pacemaker/ or exp defibrillator
2. cardiac implantable electronic device.mp.

3. cardiovascular implantable electronic device.mp.
4. pacemaker.mp. [mp=ti, ab, tx, kw, ct, ot, sh, hw]
5. defibrillator.mp. [mp=ti, ab, tx, kw, ct, ot, sh, hw]
6. cardiac resynchronization therapy.mp. or exp cardiac resynchronization therapy/
7. 1 or 2 or 3 or 4 or 5 or 6
8. device infection.mp. or exp infection/ or exp device infection/
9. infection.mp.
10. 8 or 9
11. reimplantation or exp Reimplantation/
12. 7 and 10 and 11

### APPENDIX C1. Summary of Study Quality Assessment

| Study ID                  | Selection                                       |                                       |                              |                                                    | Comparability | Outcome                  |                                      |                                 | Total<br>(*) |
|---------------------------|-------------------------------------------------|---------------------------------------|------------------------------|----------------------------------------------------|---------------|--------------------------|--------------------------------------|---------------------------------|--------------|
|                           | Representative<br>-ness of<br>exposed<br>cohort | Selection of<br>non-exposed<br>cohort | Ascertainment<br>of exposure | Outcome<br>shown to be<br>absent at<br>study start |               | Assessment<br>of outcome | Adequacy of<br>follow up<br>duration | Adequacy of<br>cohort follow up |              |
| Amraoui (2015)            | B (*)                                           | --                                    | A (*)                        | A (*)                                              | --            | B (*)                    | A (*)                                | A (*)                           | 6            |
| Boyle (2017)              | A (*)                                           | --                                    | A (*)                        | A (*)                                              | --            | B (*)                    | A (*)                                | A (*)                           | 6            |
| Chua (2000)               | B (*)                                           | --                                    | A (*)                        | A (*)                                              | --            | B (*)                    | A (*)                                | B (*)                           | 6            |
| Deharo (2012)             | B (*)                                           | --                                    | A (*)                        | A (*)                                              | --            | B (*)                    | A (*)                                | A (*)                           | 6            |
| Molina (1997)             | C                                               | --                                    | A (*)                        | B                                                  | --            | B (*)                    | A (*)                                | D                               | 3            |
| Saaed (2014)              | B (*)                                           | --                                    | A (*)                        | A (*)                                              | --            | B (*)                    | A (*)                                | A (*)                           | 6            |
| Tascini (2006)            | B (*)                                           | --                                    | A (*)                        | A (*)                                              | --            | B (*)                    | A (*)                                | C (*)                           | 6            |
| Mountantounakis<br>(2013) | C                                               | --                                    | A (*)                        | A (*)                                              | --            | B (*)                    | A (*)                                | A (*)                           | 5            |

### APPENDIX C2. Newcastle Ottawa Quality Assessment Form for Cohort Studies

(Reference: Wells GA et al. *The Newcastle-Ottawa Scale (NOS) for assessing the quality of nonrandomised studies in meta-analyses*. Available at [http://www.ohri.ca/programs/clinical\\_epidemiology/oxford.asp](http://www.ohri.ca/programs/clinical_epidemiology/oxford.asp).)

**Note:** A study can be awarded a maximum of one star for each numbered item within the Selection and Outcome categories. A maximum of two stars can be given for Comparability

#### Selection

##### 1) Representativeness of the exposed cohort

- truly representative of the average \_\_\_\_\_ (describe) in the community ☐
- somewhat representative of the average \_\_\_\_\_ in the community ☐
- selected group of users eg nurses, volunteers
- no description of the derivation of the cohort

##### 2) Selection of the non exposed cohort

- drawn from the same community as the exposed cohort ☐
- drawn from a different source

c) no description of the derivation of the non exposed cohort

3) Ascertainment of exposure

- a) secure record (eg surgical records)
- b) structured interview
- c) written self report
- d) no description

4) Demonstration that outcome of interest was not present at start of study

- a) yes
- b) no

**Comparability**

1) Comparability of cohorts on the basis of the design or analysis

- a) study controls for \_\_\_\_\_ (select the most important factor)
- b) study controls for any additional factor  (This criteria could be modified to indicate specific control for a second important factor.)

**Outcome**

1) Assessment of outcome

- a) independent blind assessment
- b) record linkage
- c) self report
- d) no description

2) Was follow-up long enough for outcomes to occur

- a) yes (select an adequate follow up period for outcome of interest)
- b) no

3) Adequacy of follow up of cohorts

- a) complete follow up - all subjects accounted for
- b) subjects lost to follow up unlikely to introduce bias - small number lost - > \_\_\_\_ % (select an adequate %) follow up, or description provided of those lost)
- c) follow up rate < \_\_\_\_ % (select an adequate %) and no description of those lost
- d) no statement
